# Supplementary material for: Lactobacilli Probiotics Prevent Amyloid-Beta Fibril Formation In Vitro
Source: Research Square preprint supplement (doi:10.21203/rs.3.rs-6505627/v1), 2025-04-23
Supplement: Supplementary file 1 [file 41dbab87fe3c711513f6a12a.docx]

Supplementary Table 1

| UB gene ID | Species-dependent |
| --- | --- |
| UB Gene Symbol | rrs |
| UB forward primer sequence | ACTCCTACGGGAGGCAGCAG |
| UB reverse primer sequence | ATTACCGCGGCTGCTGG |
| Amplification efficiency | 108% |
| Slope and R2 | -3.142, 0.997 |
|  |  |
| LR gene ID | 6142300 (DSM 20016) |
| LR Gene Symbol | rrs |
| LR forward primer sequence | GAAGATCAGTCGCAYTGGCCCAA |
| LR reverse primer sequence | TCCATTGTGGCCGATCAG |
| Amplification efficiency | 100% |
| Slope and R2 | -3.3-6, 0.998 |
